# Supplementary figures and images for: Lethal photosensitisation of Staphylococcus aureus using a toluidine blue O–tiopronin–gold nanoparticle conjugate
Source: Royal Society of Chemistry journal article supplement (doi:10.1039/b706615e), 2007-01-01

### TBO-tiopronin-gold nanoparticles

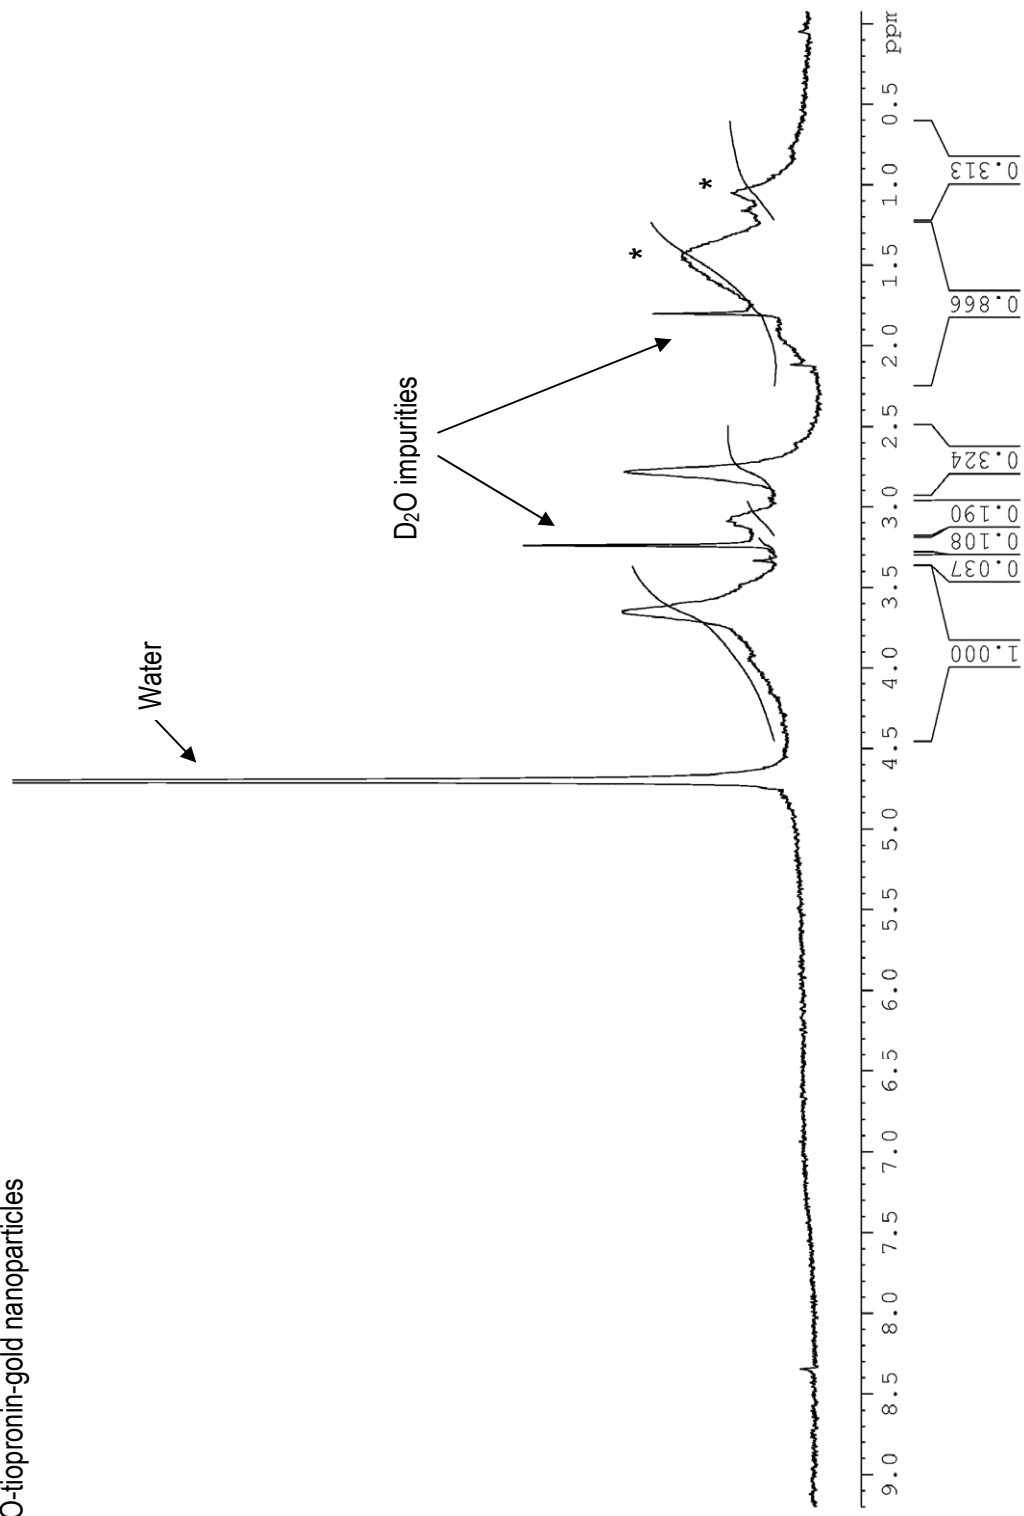

Supplement: b706615e.pdf [file b706615e.pdf]
